# Supplementary material for: A phase II study of N-acetylcysteine in cancer patients with severe COVID-19: clinical outcomes and biological correlates
Source: Research Square preprint supplement (doi:10.21203/rs.3.rs-1836295/v1), 2022-07-18
Supplement: Supplementary file 1 [file 0607e113b24caff3566fffb0.pdf]

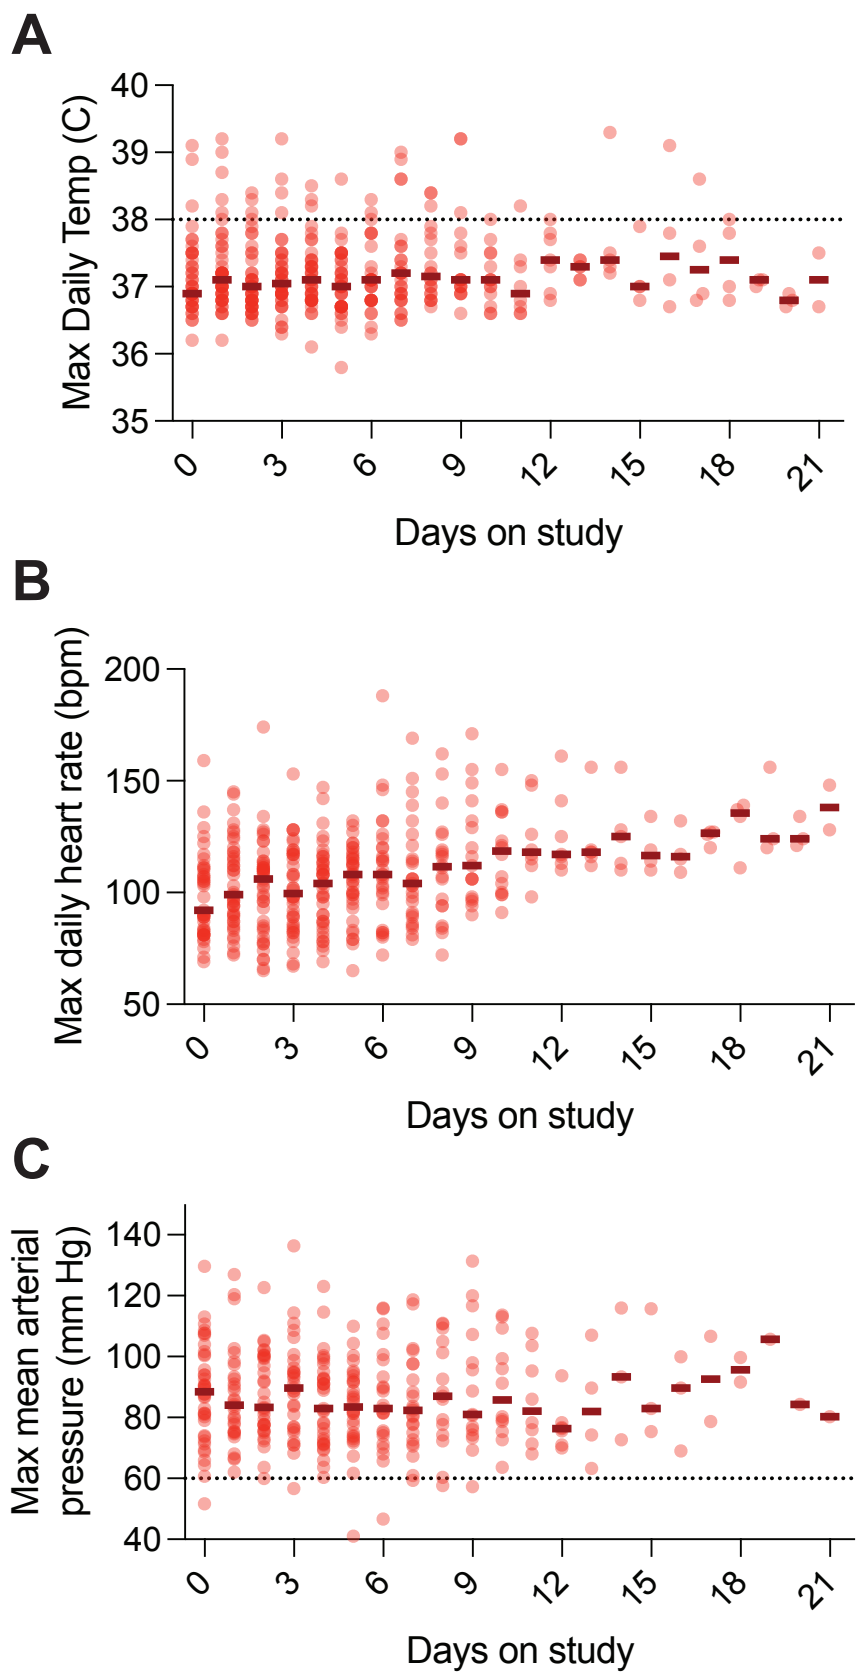

**Supplementary Figure 1. Vital signs during treatment with N-acetylcysteine.** Daily maximum temperature (A), heart rate (B), and mean arterial pressure (C) for each patient on each day of treatment is shown. Horizontal bar refers to median of all values on a given day of treatment.
