# Supplementary material for: A phase II study of N-acetylcysteine in cancer patients with severe COVID-19: clinical outcomes and biological correlates
Source: Research Square preprint supplement (doi:10.21203/rs.3.rs-1836295/v1), 2022-07-18
Supplement: Supplementary file 2 [file db901d79cc7fccdd394f9aea.pdf]

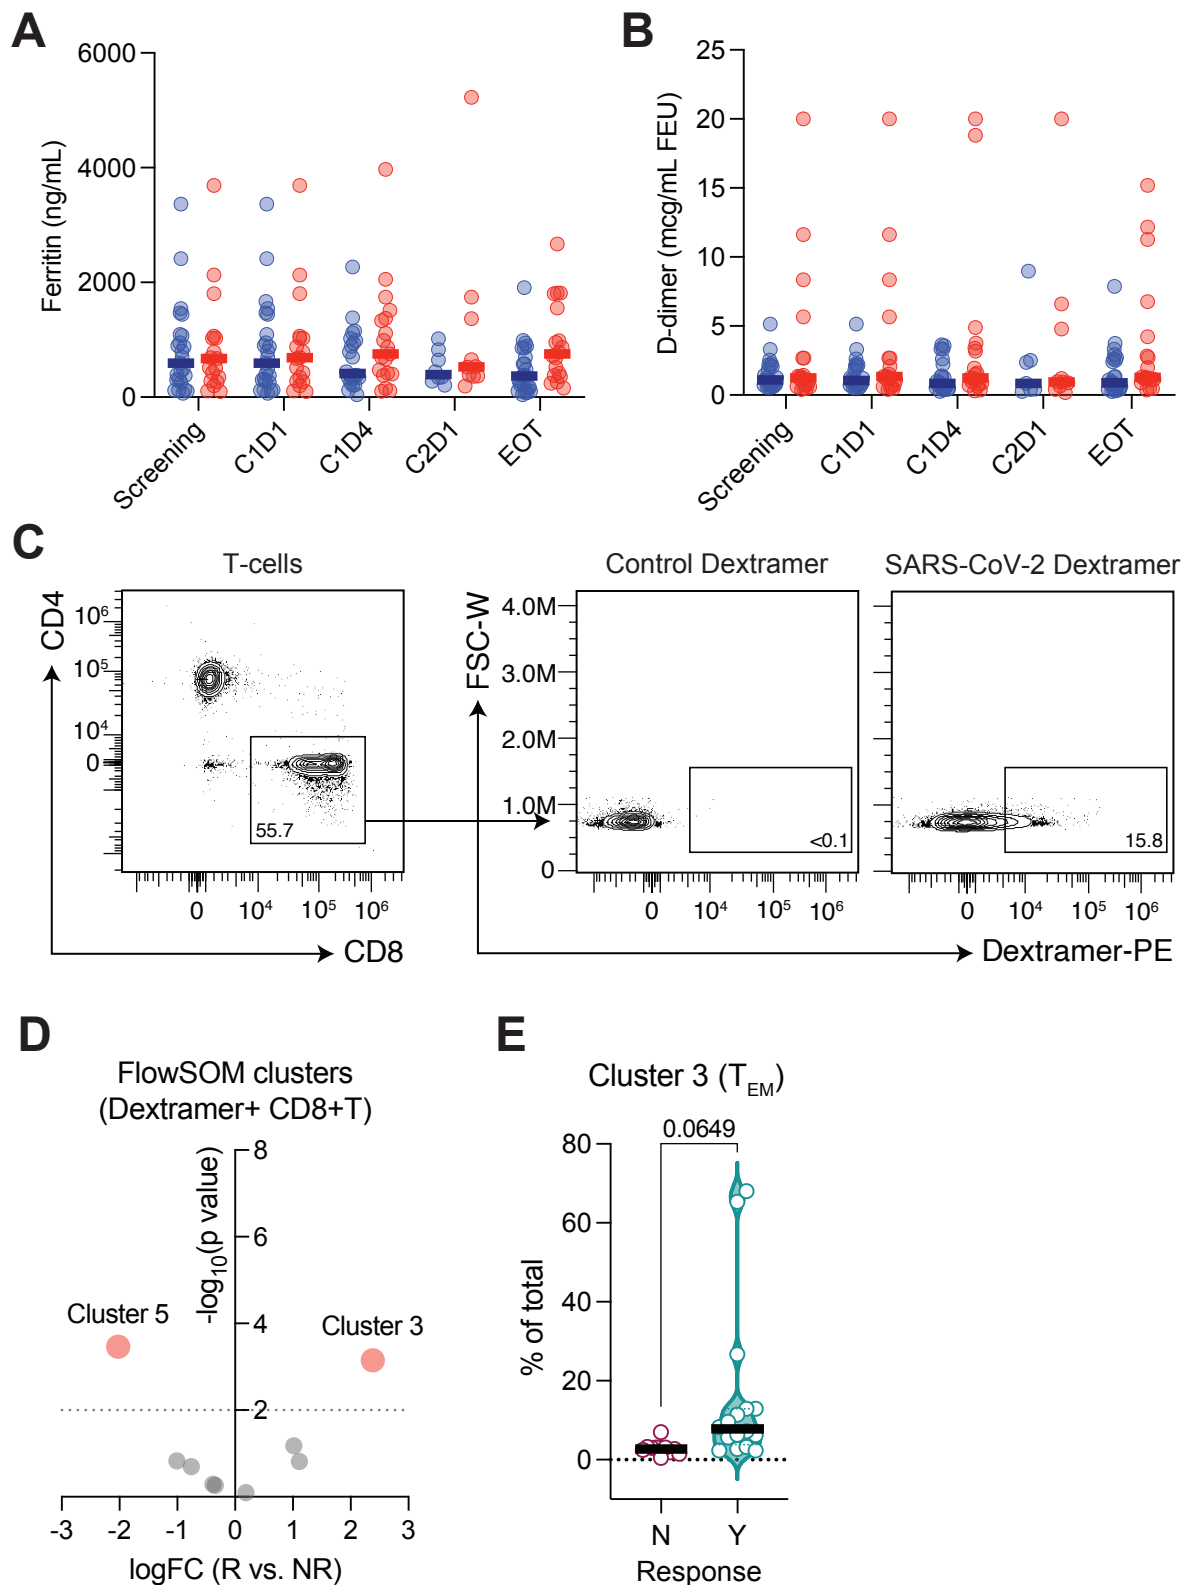

**Supplementary Figure 3. Laboratory biomarkers during treatment with N-acetylcysteine.** (A,B) Peripheral blood ferritin (A) and D-dimer (B) levels in patients receiving N-Acetylcysteine, stratified by clinical response. (C) Gating strategy for total CD8+ and Dextramer+ CD8+ T-cells used for high dimensional analysis in Figure 4 and Supplementary Figure 3. (D,E) EdgeR analysis of differences in abundance of Dextramer+ CD8+ T-cell FlowSOM clusters between responders (R) and non-responders (NR) as indicated. P values of differences in cluster 3 abundance between responders and non-responders in (E) determined by student's t-test.
